# Supplementary material for: Gliadin-coated gold nanoparticles for rapid colorimetric test for celiac disease
Source: Royal Society of Chemistry journal article supplement (doi:10.1039/d0ma00495b), 2020-01-01
Supplement: d0ma00495b1.pdf [file d0ma00495b1.pdf]

## **Gliadin-coated Gold Nanoparticles for Rapid Colorimetric Test for**

### **Celiac Disease**

Anantdeep Kaur<sup>a,b</sup>, Ying Wang,<sup>a</sup> Michael Wallach<sup>\*b</sup> and Olga Shimoni<sup>\*a,c</sup>

<sup>a</sup>Institute for Biomedical Materials and Devices, Faculty of Science, The University of Technology Sydney, 15 Broadway, Ultimo, Sydney, New South Wales, 2007, Australia.

<sup>b</sup>School of Life Sciences, Faculty of Science, The University of Technology Sydney, 15 Broadway, Ultimo, Sydney, New South Wales, 2007, Australia

<sup>c</sup>ARC Research Hub for Integrated Device for End-user Analysis at Low-levels (ARC IDEAL Hub), Faculty of Science, University of Technology Sydney, 15 Broadway, Ultimo NSW 2007, Australia

\*Corresponding Authors: [Michael.wallach@uts.edu.au](mailto:Michael.wallach@uts.edu.au), [olga.shimoni@uts.edu.au](mailto:olga.shimoni@uts.edu.au)

## ESI

### S1 calculation of the molar extinction coefficient of Gliadin and BSA

The ProtParam tool (ExPasy Bioinformatics Resource Portal) was used to compute the molar extinction coefficient of gliadin and the peptide sequence. Gliadin was specified as a Swiss-Prot accession number (P02863). The computation was carried out on the complete sequence of gliadin composed of 286 amino acids. BSA is specified as a Swiss-Prot accession number (P02769). The extinction coefficient was calculated on the complete sequence composed of 607 amino acids. The results of the analysis are described in Table S1.

**Table S1 Molecular extinction coefficient of Gliadin and BSA**

| Protein/Peptide | Molecular weight | Extinction coefficient                 |
|-----------------|------------------|----------------------------------------|
| Gliadin         | 31 kDa           | 19285 M <sup>-1</sup> cm <sup>-1</sup> |
| BSA             | 66.5 kDa         | 47790 M <sup>-1</sup> cm <sup>-1</sup> |

### S2 Spectral data of Gliadin-coated AuNPs

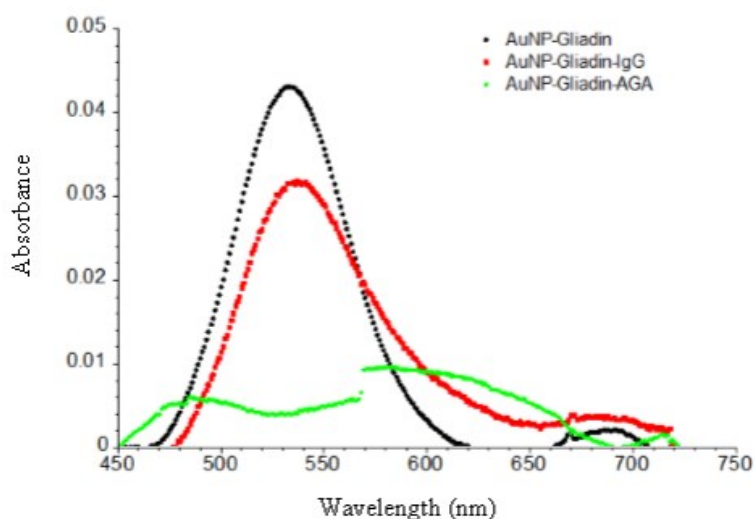

**Figure S2.** Typical UV-Vis spectra of gliadin-coated AuNPs (black), upon incubation with control IgG (red) and with AGA (green).

**S3 Testing the effect of the addition of AGA at a level normally found in serum to uncoated 20 nm AuNPs.**

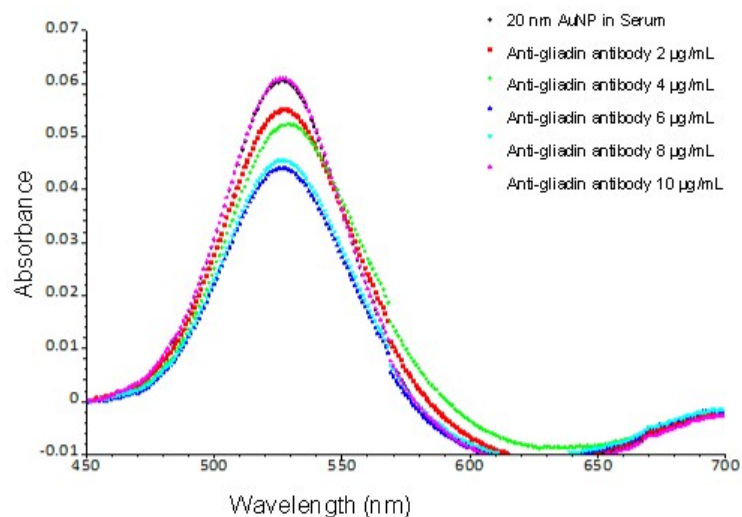

**Figure S3.** Incubation of uncoated AuNPs in serum with AGA at various dilutions.

**S4 Testing the effect of the addition of AGA at a level normally found in serum to AuNPs coated with BSA.**

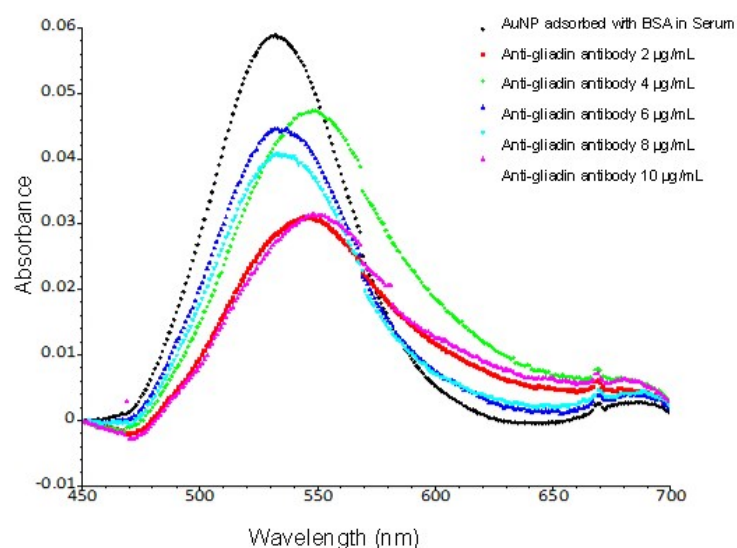

**Figure S4.** Incubation of BSA coated AuNPs in serum with AGA at various dilutions.

BSA has an isoelectric point (pI) of 4.6, therefore at neutral pH, it displays a negative charge (zeta potential  $\sim 10$  mV). Although an antibody (such as AGA) molecule is specific to the antigenic determinant to which it binds, the specificity is further related to the affinity and avidity of the antibody. Antibody affinity is associated with the preciseness of a stereochemical fit of an antibody combining site to its complementary antigen determinant. It is, however, commonly observed that some antigenic determinants are shared between molecules, most likely due to electrostatic and hydrogen interaction. In such a scenario, some antibodies that are induced in response to one antigen may combine with another antigen as well by cross-reacting leading to a stronger effect on BSA coated AuNPs compared with uncoated AuNPs.

**S5 Statistical analysis of values for samples with AuNP adsorbed with gliadin in the presence of AGA antibody and the control antibody (IgG from rabbit serum) at dilutions 2-10  $\mu\text{g/mL}$ .**

**Table (S5)** Shows the calculated p value in AuNP adsorbed with gliadin in the presence of AGA antibody and the control antibody (IgG from rabbit serum) at dilutions 1-10  $\mu\text{g/mL}$ .

| Sample                                      | Percentage Absorbance | <i>t-test</i> p-values |
|---------------------------------------------|-----------------------|------------------------|
| AuNP adsorbed with gliadin                  | 100                   |                        |
| Anti-gliadin antibody 2.0 $\mu\text{g/mL}$  | 54                    | 0.004                  |
| Control antibody 2.0 $\mu\text{g/mL}$       | 83                    |                        |
| Anti-gliadin antibody 4.0 $\mu\text{g/mL}$  | 45                    | 0.002                  |
| Control antibody 4.0 $\mu\text{g/mL}$       | 80                    |                        |
| Anti-gliadin antibody 6.0 $\mu\text{g/mL}$  | 36                    | 0.001                  |
| Control antibody 6.0 $\mu\text{g/mL}$       | 80                    |                        |
| Anti-gliadin antibody 8.0 $\mu\text{g/mL}$  | 33                    | 0.001                  |
| Control antibody 8.0 $\mu\text{g/mL}$       | 72                    |                        |
| Anti-gliadin antibody 10.0 $\mu\text{g/mL}$ | 40                    | 0.004                  |
| Control antibody 10.0 $\mu\text{g/mL}$      | 68                    |                        |

The assay sensitivity in spiked serum and saliva was calculated as Colorimetric Response =  $I_{\text{max}}$  at 580 nm /  $I$  at 532 nm i.e. absorbance value obtained at 580 nm. This is the wavelength

where a shift in absorbance is observed following the interaction of the antibody with the AuNP coated with gliadin in serum/saliva divided by the maximum absorbance value of AuNP coated with gliadin in serum/saliva.

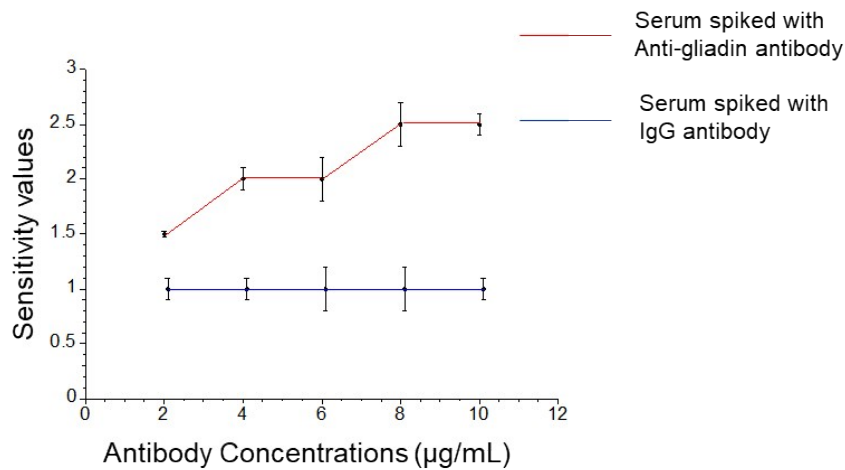

**Figure S6.** Colorimetric response curve plotted in AuNP adsorbed with gliadin in 1:10 diluted serum following the addition of AGA antibody at dilutions 2 µg/mL, 4 µg/mL, 6 µg/mL, 8 µg/mL and 10 µg/mL.

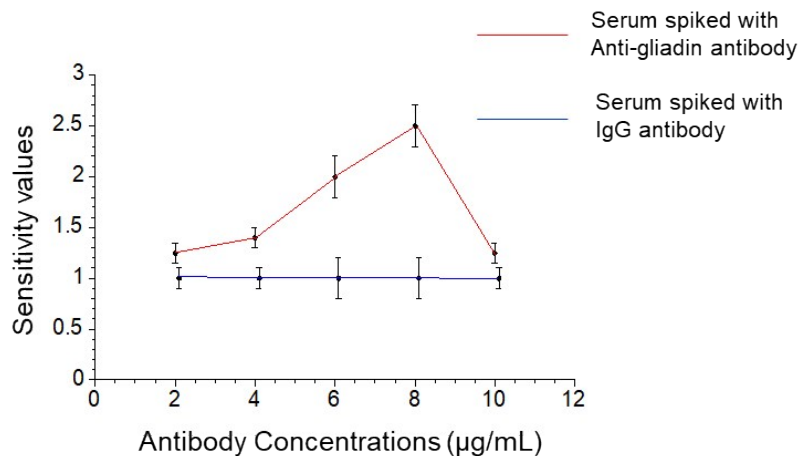

**Figure S7.** Colorimetric response curve plotted in AuNP adsorbed with gliadin in 1:50 diluted serum following the addition of AGA at dilutions 2 µg/mL, 4 µg/mL, 6 µg/mL, 8 µg/mL and 10 µg/mL.

**Table S8.** Comparison of the patient samples analyzed using the AuNP-AGA test with the previously existing histology and serological\* results

| Volunteer           | Histology | tTG-IgA     | DGP-IgG    | AuNP-AGA Test |
|---------------------|-----------|-------------|------------|---------------|
| n.1                 | CD        | 1 (<4)      | 3 (<20)    | CD Positive   |
| n.2                 | Non-CD    | 0.1 (0-6)   | 0.2 (0-6)  | CD Negative   |
| n.3                 | CD        | >100 (<4)   | 33 (<20)   | CD Positive   |
| n.4                 | CD        | 121 (<20)   |            | CD Positive   |
| n.5                 | CD        | >100 (<4)   | >100 (<20) | CD Positive   |
| n.6                 | CD        | 217 (<5)    | >150 (<20) | CD Positive   |
| n.7                 | CD        | 13 (0-6)    | 23 (0-6)   | CD Positive   |
| n.8                 | CD        | >100 (<5)   | >100 (<20) | CD Positive   |
| n.9                 | CD        | 11 (0-6)    | 1.4 (0-6)  | CD Positive   |
| n.10                | CD        | 9 (<4)      | 97 (<20)   | CD Positive   |
| n.11 <sup>†</sup>   | CD        | 18.2 (0<20) | 3 (0.20)   | CD Negative   |
| n.12 <sup>††</sup>  | CD        | 16 (0-20)   | 7 (<20)    | CD Positive   |
| n.13                | Non-CD    | 4 (0-20)    |            | CD Negative   |
| n.14                | CD        | 47 (<5)     | 86 (<5)    | CD Positive   |
| n.15                | CD        | 74 (0-20)   |            | CD Positive   |
| n.16                | CD        | 145 (0-20)  |            | CD Positive   |
| n.17                | CD        | 57 (<4)     | 93 (<20)   | CD Positive   |
| n.18                | CD        | 149 (<20)   | 63 (<20)   | CD Positive   |
| n.19                | CD        | >100 (<4)   | >100 (<20) | CD Positive   |
| n.20 <sup>†††</sup> | Non-CD    | 3.8 (<6)    | 37 (<6)    | CD Positive   |
| n.21                | Non-CD    | <5 (<5)     | <20 (<20)  | CD Negative   |
| n.22                | CD        | 180 (0-6)   | 21 (0-6)   | CD Positive   |
| n.23                | CD        | 20 (0-6)    | 8.1 (0-6)  | CD Positive   |

\* Serology tTG (tissue transglutaminase), DGP (Deaminated gliadin peptides) results are indicated as IgA or IgG levels followed by normal reference ranges in brackets.

<sup>†</sup> Following GFD > 8 weeks, <sup>††</sup> Following GFD < 2 weeks, <sup>†††</sup> False-positive based on histology and tTG antibody titre.

**Table S9. Analysis of 7 samples with potential or latent CD using the AuNP-AGA test as compared with previously existing serology\*. Cases are separated into those with**

histological observations of patchy /irregular Mucosal lesions or those with mucosal inflammation resulting from an increase in  $\gamma\delta^+$  IELs.

| Volunteer | Histology                          | tTG-IgA   | DGP-IgG   | AuNP-AGA Test |
|-----------|------------------------------------|-----------|-----------|---------------|
| n.24      | Mucosal lesions                    | 5 (<20)   | 17 (<20)  | CD Positive   |
| n.25      | Mucosal lesions                    | 28 (0-6)  | 22 (0-6)  | CD Positive   |
| n.26      | Mucosal lesions                    | 4.8 (0-6) | 22 (0-6)  | CD Positive   |
| n.27      | Increased $\gamma\delta^+$<br>IELs | 12 (0-6)  | 18 (0-6)  | CD Positive   |
| n.28      | Increased $\gamma\delta^+$<br>IELs | 11 (0-6)  | 13 (0-6)  | CD Positive   |
| n.29      | Increased $\gamma\delta^+$<br>IELs | <5 (<5)   | <20 (<20) | CD Positive   |
| n.30      | Increased $\gamma\delta^+$<br>IELs | <5 (<5)   | 22 (<20)  | CD Positive   |

\* Serology tTG (tissue transglutaminase), DGP (Deaminated gliadin peptides) results are indicated as IgA or IgG levels followed by normal reference ranges in brackets, IELs (Intraepithelial lymphocytes).
